# Supplementary material
Source: PubMed Central journal article supplement (PMC5565452)
Supplement: pnas.1706399114.sfig02.pdf [file pnas.1706399114.sfig02.pdf]

a) Plant feeding clades

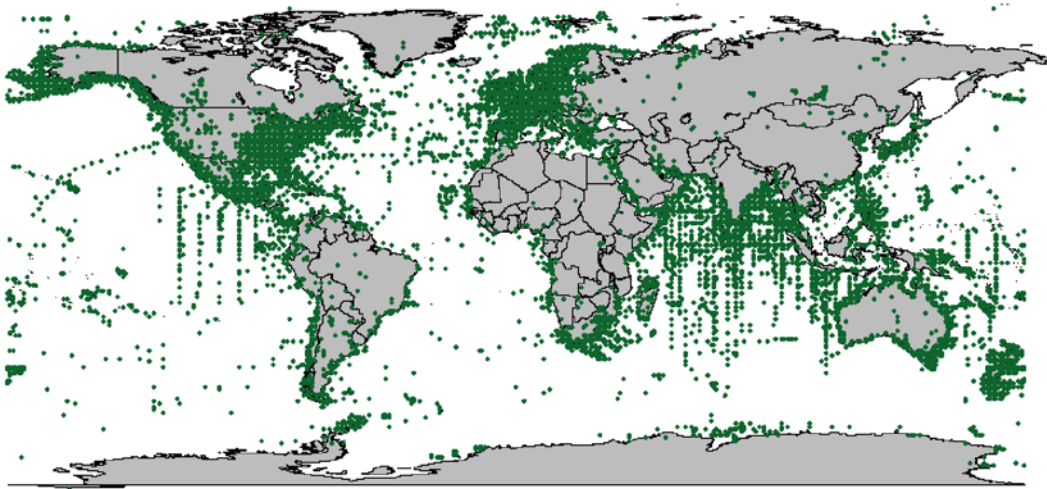

b) Sister clades

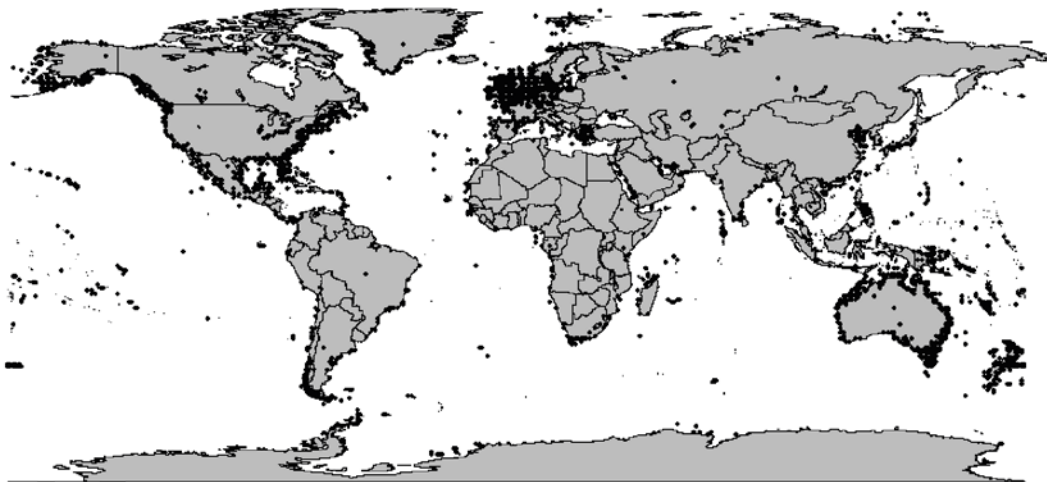

**Fig. S2.** Global distributions of all taxa from a) plant feeding clades and b) their sister clades. Data are 490319 occurrence records from the Global Biodiversity Information Facility (April 2015).
