# Supplementary material
Source: PubMed Central journal article supplement (PMC5565452)
Supplement: pnas.1706399114.sfig03.pdf [file pnas.1706399114.sfig03.pdf]

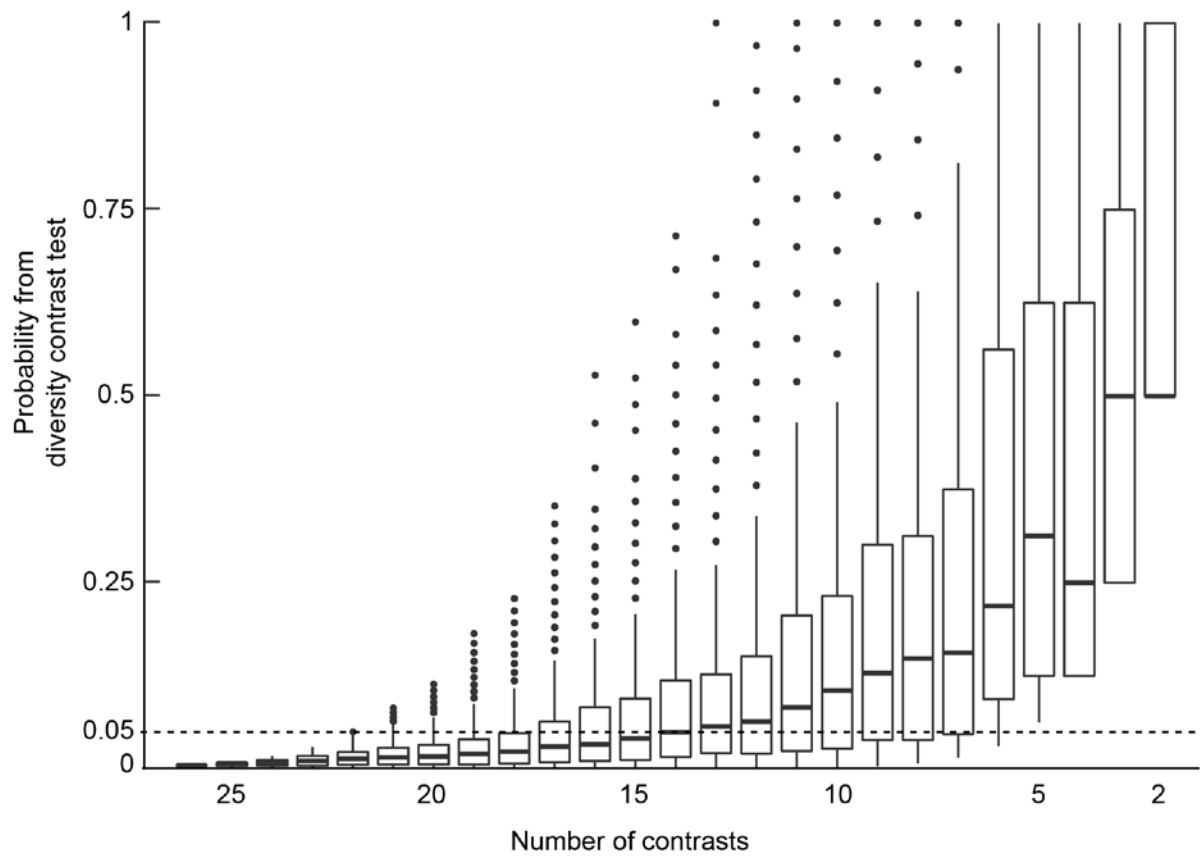

**Fig. S3.** The probability of the diversity contrast test with declining numbers of contrasts used. The data are the distribution of P values from 1000 random samples taken from the full data set of 25 contrasts.
